# Supplementary material for: Integrated Proteogenomic Analysis Reveals Distinct Potentially Actionable Therapeutic Vulnerabilities in Triple-Negative Breast Cancer Subtypes
Source: MDPI journal article supplement (doi:10.3390/cancers16030516), 2024-01-25

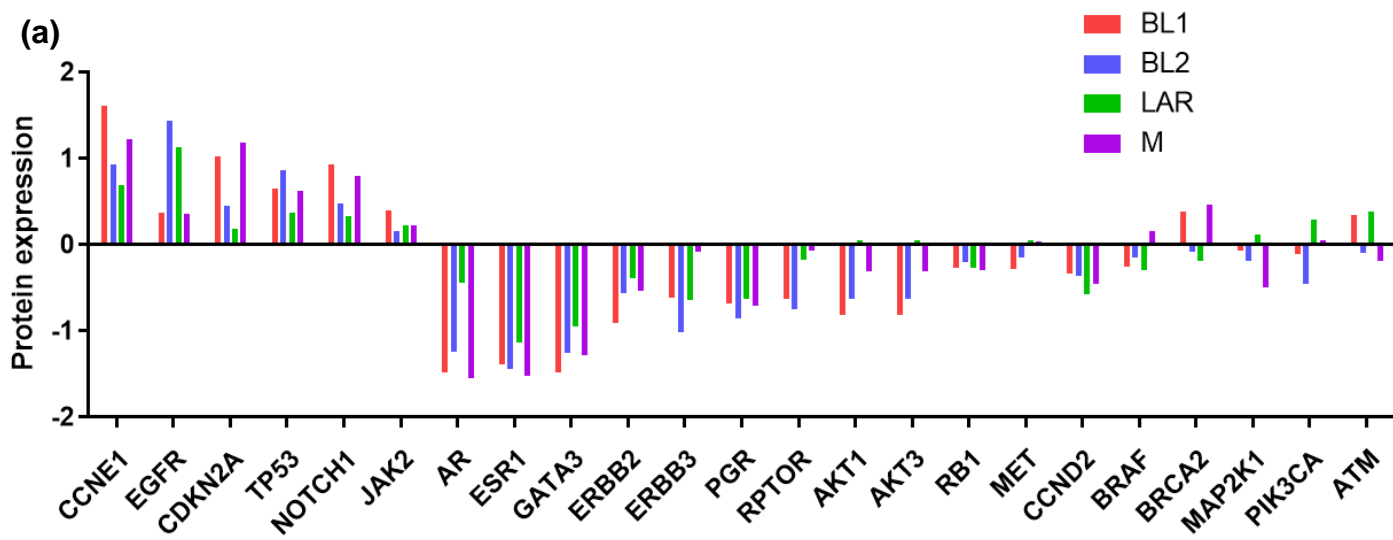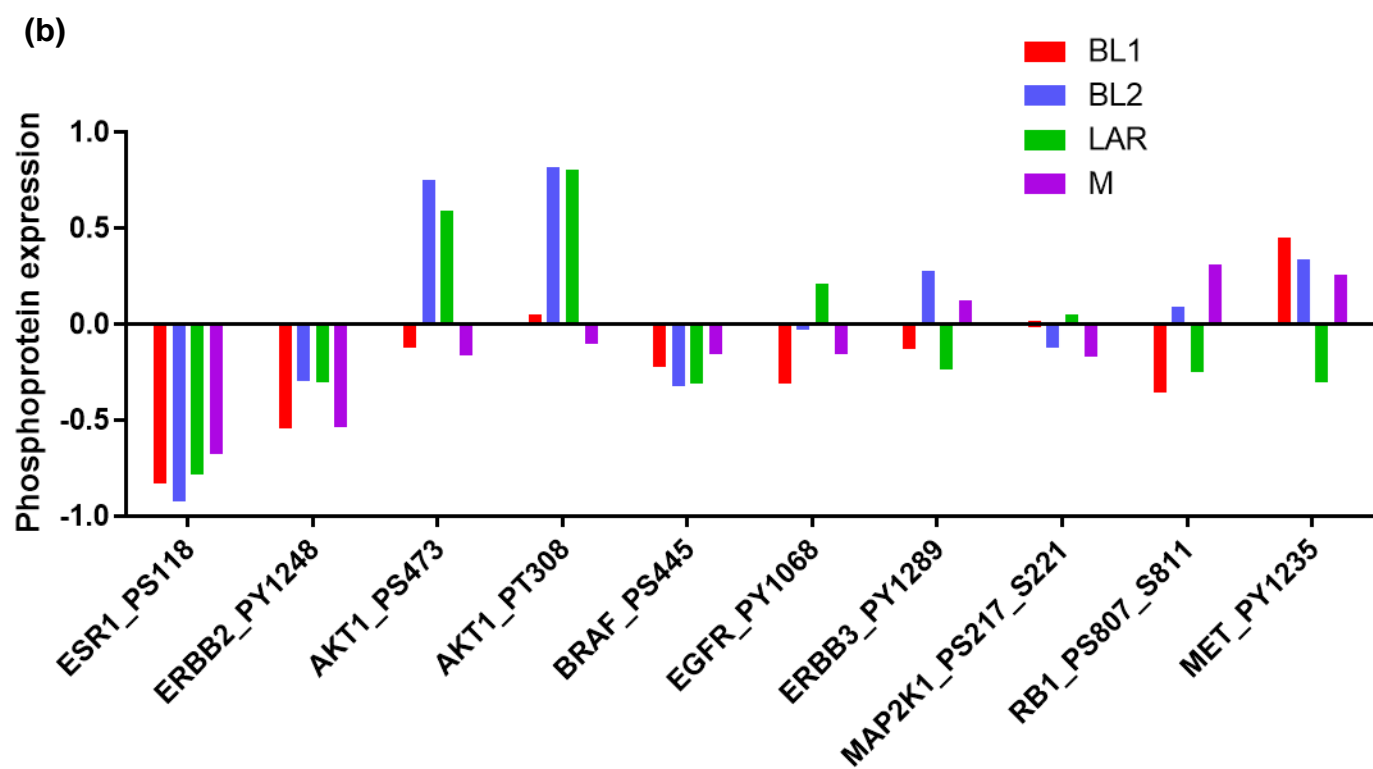

(a)

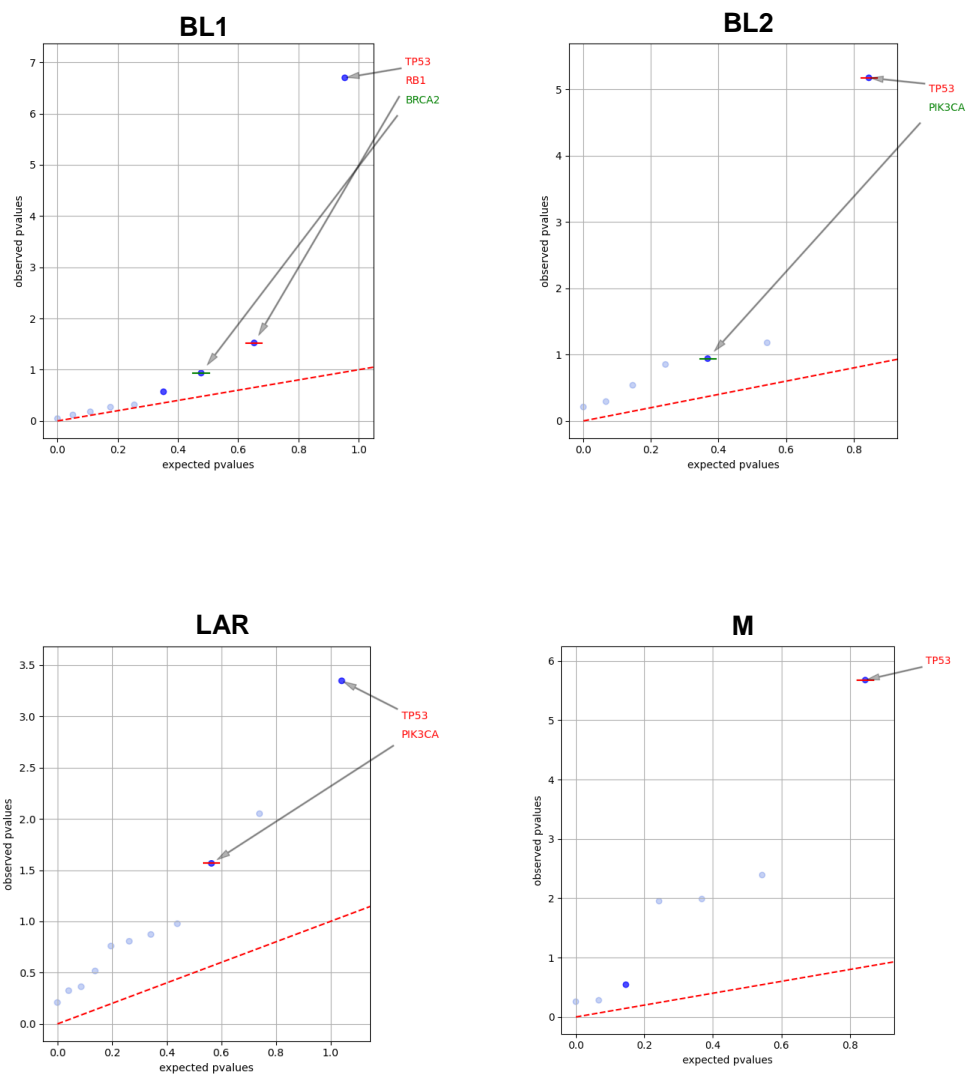

(b)

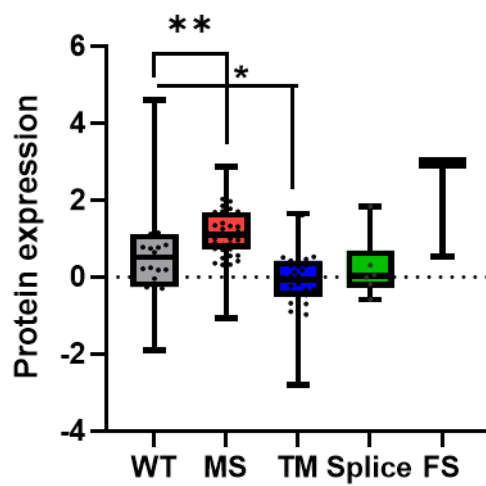

(a)

|                                                   |              |             |         | BL1     |         |            | BL2    | LAR        |         | M       |
|---------------------------------------------------|--------------|-------------|---------|---------|---------|------------|--------|------------|---------|---------|
|                                                   |              | Drugs       | Targets | HCC2157 | HCC1599 | MDA-MB-468 | HDQ-P1 | MDA-MB-453 | CAL-148 | CAL-120 |
| Target genes having mRNA:CNAs association         | FDA-Approved | Lapatinib   | ERBB2   |         |         |            |        |            |         |         |
|                                                   |              | Lapatinib   | EGFR    |         |         |            |        |            |         |         |
|                                                   | Others       | MIRA-1      | TP53    |         |         |            |        |            |         |         |
|                                                   |              | Sapitinib   | ERBB2   |         |         |            |        |            |         |         |
|                                                   |              | Fulvestrant | ESR1    |         |         |            |        |            |         |         |
|                                                   |              | KU-55933    | ATM     |         |         |            |        |            |         |         |
|                                                   |              | AZD3514     | AR      |         |         |            |        |            |         |         |
|                                                   |              | Cetuximab   | EGFR    |         |         |            |        |            |         |         |
|                                                   |              | AZD3759     |         |         |         |            |        |            |         |         |
|                                                   |              | Osimertinib |         |         |         |            |        |            |         |         |
|                                                   |              | Sapitinib   |         |         |         |            |        |            |         |         |
|                                                   |              | AZD3759     |         |         |         |            |        |            |         |         |
|                                                   |              | Ruxolitinib | JAK2    |         |         |            |        |            |         |         |
|                                                   |              | GSK2110183B | AKT1    |         |         |            |        |            |         |         |
|                                                   |              | AZD5363     |         |         |         |            |        |            |         |         |
|                                                   |              | Afuresertib |         |         |         |            |        |            |         |         |
|                                                   |              | Ipatasertib |         |         |         |            |        |            |         |         |
|                                                   |              | Uprosertib  |         |         |         |            |        |            |         |         |
|                                                   |              | MK-2206     |         |         |         |            |        |            |         |         |
|                                                   |              | Lapatinib   |         |         |         |            |        |            |         |         |
| Target genes having Protein:CNAs association      | FDA-Approved | Cetuximab   | EGFR    |         |         |            |        |            |         |         |
|                                                   |              | AZD3759     |         |         |         |            |        |            |         |         |
|                                                   | Others       | Osimertinib |         |         |         |            |        |            |         |         |
|                                                   |              | Sapitinib   |         |         |         |            |        |            |         |         |
|                                                   |              | AZD3759     |         |         |         |            |        |            |         |         |
|                                                   |              | Ruxolitinib | JAK2    |         |         |            |        |            |         |         |
| Target genes having Protein:mRNA: CNA association | FDA-Approved | Lapatinib   | EGFR    |         |         |            |        |            |         |         |
|                                                   |              | Cetuximab   |         |         |         |            |        |            |         |         |
|                                                   | Others       | AZD3759     |         |         |         |            |        |            |         |         |
|                                                   |              | Osimertinib |         |         |         |            |        |            |         |         |
|                                                   |              | Sapitinib   |         |         |         |            |        |            |         |         |
|                                                   |              | AZD3759     |         |         |         |            |        |            |         |         |

Drug Sensitivity

 Drug Resistance

(b)

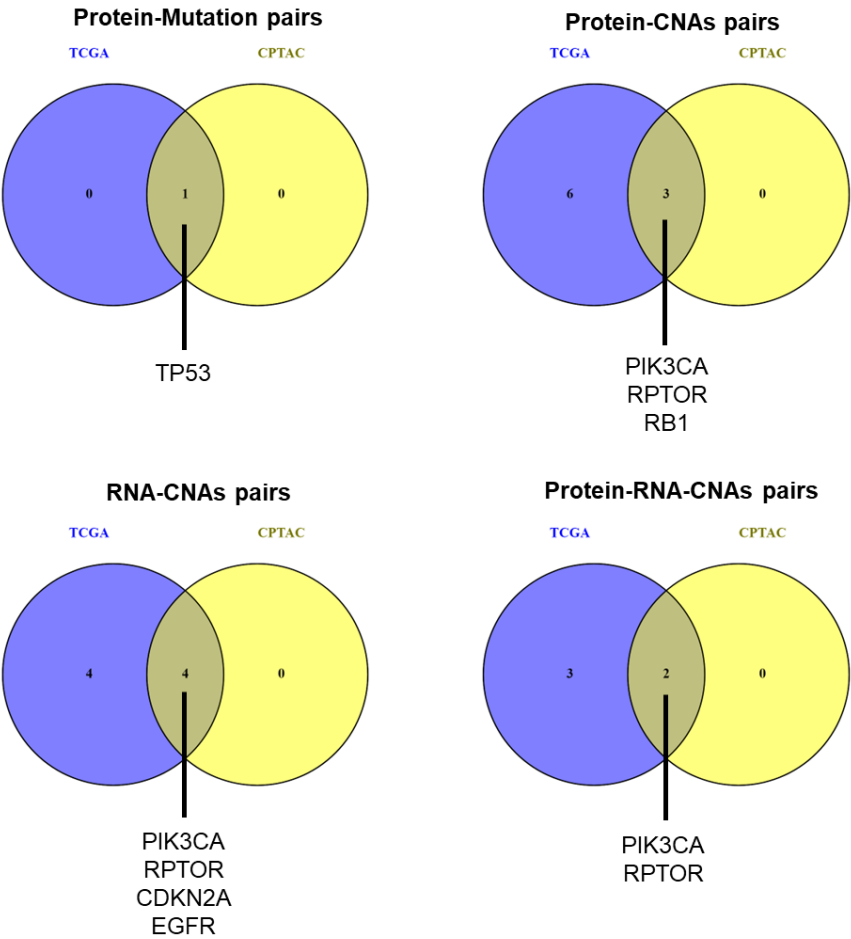

Supplement: s1 [file s1]
