# Supplementary material for: Integrated Proteogenomic Analysis Reveals Distinct Potentially Actionable Therapeutic Vulnerabilities in Triple-Negative Breast Cancer Subtypes
Source: Cancers (Basel). 2024 Jan 25;16(3):516. doi: 10.3390/cancers16030516 (PMC10854633; doi:10.3390/cancers16030516)
Supplement: Supplementary file 1 [file cancers-16-00516-s001.zip › Supplementary tables.xlsx]

## Sheet: Supp. table S1
Supplementary Table S1: Positive and negative protein-protein correlation in TNBC subtypes
	Positive				Negative
	Protein 1	Protein 2	Spearman Correlation rho-value	Adjusted p-value	Protein 1	Protein 2	Spearman Correlation rho-value	Adjusted p-value
BL1	AR	EGFR	0.690842	8.57696e-06	AR	CCNE1	-0.503342	0.00282725
	AR	MET	0.612634	0.000150827	CCND1	ERBB2	-0.511029	0.00237272
	ATM	AKT1	0.655414	3.478e-05	CCNE1	ESR1	-0.632353	7.88152e-05
	ATM	AKT3	0.655414	3.478e-05	CCNE1	MAP2K1	-0.545455	0.00102748
	ATM	JAK2	0.688168	9.59723e-06	CCNE1	MET	-0.510695	0.00239108
	CCND1	RB1	0.742647	7.47787e-07	EGFR	JAK2	-0.52373	0.00176021
	CCND1	MET	0.571858	0.000507627	ESR1	CDKN2A	-0.559826	0.000705098
	CCNE1	CDKN2A	0.61865	0.000124307	ERBB2	CCND1	-0.511029	0.00237272
	ESR1	PGR	0.557487	0.000750539	JAK2	EGFR	-0.52373	0.00176021
	JAK2	RPTOR	0.531417	0.00146087
BL2	BRAF	JAK2	0.524562	0.0121991	AR	BRAF	-0.513269	0.0145645
	CCNE1	CDKN2A	0.63259	0.00158188	ATM	CCND1	-0.504235	0.0167142
	EGFR	RB1	0.507623	0.0158798	AKT1	TP53	-0.621858	0.00200292
	JAK2	BRAF	0.524562	0.0121991	AKT3	TP53	-0.621858	0.00200292
	PGR	NOTCH1	0.57764	0.0048735	AR	BRAF	-0.513269	0.0145645
	PIK3CA	RPTOR	0.511011	0.0150796	AR	CCND1	-0.549407	0.732221
	RB1	MET	0.520045	0.0131045	CCND1	BRAF	-0.549407	0.00808578
					CCND1	JAK2	-0.727837	0.000123347
					CCNE1	MET	-0.648786	0.00108939
					CDKN2A	EGFR	-0.503813	0.0168206
					MET	GATA3	-0.579898	0.004671
					JAK2	MET	-0.539243	0.00960248
					EGFR	CDKN2A	-0.503813	0.0168206
LAR	AKT1	AKT3	1	0	BRAF	MET	-0.605911	0.000495034
	CCND1	RB1	0.638916	0.000191158
	CCND1	MET	0.521675	0.00370403
	ESR1	PGR	0.714778	1.32271e-05
	RB1	MET	0.551232	0.00194002
M	BRAF	ERBB2	0.588177	0.000791637	ATM	PGR	-0.505911	0.00511156
	CCND1	RB1	0.583251	0.000897648	BRAF	CCND1	-0.657143	0.000107648
	CCNE1	CDKN2A	0.650739	0.000132277	BRCA2	GATA3	-0.584236	0.000875506
	ESR1	PGR	0.634483	0.000218605	MAP2K1	GATA3	-0.74532	3.5062e-06
	ERBB2	ERBB3	0.521675	0.00370403	ERBB3	CDKN2A	-0.502956	0.00542075

## Sheet: Supp. table S2
Supplementary table S2: OncodriveFML analysis for the detection of candidate driver genes in TNBC subtypes
TNBC subtypes	GENE_ID	MUTS	MUTS_RECURRENCE	SAMPLES	P_VALUE	Q_VALUE	SNP	MNP	INDELS	SYMBOL
BL1	ENSG00000141510	21	17	20	1.7e-06	3.4e-06	17	0	4	TP53
	ENSG00000141564	1	1	1	0.00437		1	0	0	RPTOR
	ENSG00000139618	1	1	1	0.00979		1	0	0	BRCA2
	ENSG00000149311	1	1	1	0.0118		1	0	0	ATM
	ENSG00000065361	2	2	2	0.28362	0.28362	2	0	0	ERBB3
	ENSG00000105976	1	1	1	0.52501		1	0	0	MET
	ENSG00000169083	1	1	1	0.55291		1	0	0	AR
BL2	ENSG00000141510	18	17	17	6.7e-06	1.34e-05	17	0	1	TP53
	ENSG00000169032	1	1	1	0.06631		1	0	0	MAP2K1
	ENSG00000121879	3	3	2	0.1148	0.1148	3	0	0	PIK3CA
	ENSG00000148400	1	1	1	0.14079		0	0	1	NOTCH1
	ENSG00000157764	1	1	1	0.28981		1	0	0	BRAF
	ENSG00000139687	2	2	1	0.51069		1	0	1	RB1
	ENSG00000065361	1	1	1	0.61615		1	0	0	ERBB3
LAR	ENSG00000141510	20	19	20	0.00045	0.0009	16	0	4	TP53
	ENSG00000139687	1	1	1	0.0089		0	0	1	RB1
	ENSG00000121879	17	13	13	0.02716	0.02716	14	0	3	PIK3CA
	ENSG00000141564	1	1	1	0.10532		1	0	0	RPTOR
	ENSG00000149311	1	1	1	0.13402		1	0	0	ATM
	ENSG00000148400	1	1	1	0.1562		1	0	0	NOTCH1
	ENSG00000096968	1	1	1	0.17387		1	0	0	JAK2
	ENSG00000082175	1	1	1	0.30434		1	0	0	PGR
	ENSG00000146648	1	1	1	0.43366		1	0	0	EGFR
	ENSG00000141736	1	1	1	0.47363		1	0	0	ERBB2
	ENSG00000065361	1	1	1	0.61828		1	0	0	ERBB3
M	ENSG00000141510	21	17	20	2.1e-06	4.2e-06	17	0	4	TP53
	ENSG00000141564	1	1	1	0.00406		1	0	0	RPTOR
	ENSG00000139618	1	1	1	0.01028		1	0	0	BRCA2
	ENSG00000149311	1	1	1	0.01117		1	0	0	ATM
	ENSG00000065361	2	2	2	0.2858	0.2858	2	0	0	ERBB3
	ENSG00000105976	1	1	1	0.52359		1	0	0	MET
	ENSG00000169083	1	1	1	0.55288		1	0	0	AR

## Sheet: Supp. table S3
Supplementary table S3: Positive protein-RNA correlation in TNBC subtypes
	Protein	RNA	Spearman Correlation rho-value	p-value
BL1	GATA3	GATA3	0.7239	0.0001
	TP53	TP53	0.7229	0.0001
	CCNE1	CCNE1	0.7139	0.0001
	ATM	ATM	0.635	0.0001
	ESR1	ESR1	0.5555	0.0008
	CDKN2A	CDKN2A	0.4816	0.0045
	NOTCH1	NOTCH1	0.4322	0.012
	ERBB3	ERBB3	0.4255	0.0136
	ERBB2	ERBB2	0.4034	0.0199
	RB1	RB1	0.3944	0.0231
BL2	GATA3	GATA3	0.8182	0.0001
	ERBB3	ERBB3	0.7832	0.0001
	TP53	TP53	0.7439	0.0001
	BRAF	BRAF	0.729	0.0001
	CCNE1	CCNE1	0.7109	0.0002
	JAK2	JAK2	0.6533	0.001
	CDKN2A	CDKN2A	0.6213	0.002
	NOTCH1	NOTCH1	0.5935	0.0036
	AR	AR	0.537	0.01
	CCND1	CCND1	0.537	0.01
	EGFR	EGFR	0.5325	0.0107
	ERBB2	ERBB2	0.4783	0.0244
LAR	CCNE1	CCNE1	0.8596	0.0001
	ESR1	ESR1	0.8433	0.0001
	GATA3	GATA3	0.8365	0.0001
	AR	AR	0.7951	0.0001
	EGFR	EGFR	0.7897	0.0001
	TP53	TP53	0.7414	0.0001
	RB1	RB1	0.732	0.0001
	CDKN2A	CDKN2A	0.6887	0.0001
	MAP2K1	MAP2K1	0.6468	0.0001
	AKT1	AKT1	0.6271	0.0003
	RPTOR	RPTOR	0.6044	0.0005
	PGR	PGR	0.603	0.0005
	NOTCH1	NOTCH1	0.5695	0.0013
	ERBB3	ERBB3	0.4305	0.0197
	BRAF	BRAF	0.4291	0.0202
	CCND1	CCND1	0.3852	0.0391
M	GATA3	GATA3	0.9138	0.0001
	CDKN2A	CDKN2A	0.7856	0.0001
	CCNE1	CCNE1	0.7365	0.0001
	MAP2K1	MAP2K1	0.7271	0.0001
	AR	AR	0.7038	0.0001
	NOTCH1	NOTCH1	0.5901	0.0008
	ERBB2	ERBB2	0.5778	0.001
	RPTOR	RPTOR	0.5483	0.0021
	TP53	TP53	0.5424	0.0024
	AKT1	AKT1	0.5069	0.005
	ATM	ATM	0.4931	0.0066
	BRCA2	BRCA2	0.4872	0.0074
	ERBB3	ERBB3	0.4291	0.0202
	EGFR	EGFR	0.4059	0.0289
	BRAF	BRAF	0.3764	0.0442

## Sheet: Supp. table S4
Supplementary table S4: Significant amplified and deleted regions in TNBC subtypes, identified by GISTIC which contains potentially actionable genes from our list.
	Amplification			Deletion
BL1	Gene	Cytoband	q-value	Gene	Cytoband	q-value
	AKT3	1q44	0.0010018	ATM	11q25	0.015762
	CCNE1	19q12	6.295e-06	PGR	11q22.3	0.025607
	PIK3CA	3q29	0.041348	RB1	13q14.2	0.0011999
	RPTOR	17q25.3	0.041348
BL2	CCNE1	19q12	0.021232	CDKN2A	9p21.3	0.00051443
LAR	PIK3CA	3q26.32	0.04408
M				ATM	11q25	0.0099942
				ESR1	6q26	0.012638
				ERBB3	12q13.13	0.032199
				PGR	11q25	0.0099942
				RB1	13q12.12	0.021816

## Sheet: Supp. table S5
Supplementary table S5: Significant association of CNAs with protein expression in actionable genes in TNBC subtypes
Breast cancer subtypes	Gene	Copy number event	Mean protein expression (z-score)	p-value (Mann-Whitney test)	q-value
BL1	EGFR	Gain	0.8	*0.0176	0.0305
	NOTCH1	Amplification	2.5	*0.0352	0.042
	PIK3CA	Gain	0.04	*0.0251	0.036
BL2	RPTOR	Gain	-0.3	*0.0194	0.0305
	CDKN2A	Deep deletion	-1.4	*0.0188	0.0305
	RB1	Deletion	-0.5	*0.0222	0.0305
LAR	CDKN2A	Gain	1.4	*0.0132	0.0305
	RB1	Shallow deletion	-0.5	*0.0287	0.036
	EGFR	Gain	1.07	*0.0146	0.0305
	EGFR	Amplification	7.1	****<0.0001	0.0017
	JAK2	Gain	0.6	*0.0330	0.036
	JAK2	Amplification	0.5	*0.0167	0.0305
M	EGFR	Gain	0.02	*0.02	0.0305
	CCND2	Gain	0.04	*0.04	0.042
	MAP2K1	Deletion	0.008	**0.008	0.0305
	CDKN2A	Gain	0.02	*0.02	0.0305
